# Supplementary material for: The cubic structure of Li 3 As stabilized by pressure or configurational entropy via the solid solution Li 3 As–Li 2 Se
Source: Royal Society of Chemistry journal article supplement (doi:10.1039/d4mr00127c), 2024-12-18
Supplement: d4mr00127c1.pdf [file d4mr00127c1.pdf]

# The cubic structure of $\text{Li}_3\text{As}$ stabilized by pressure or configurational entropy via the solid solution $\text{Li}_3\text{As} - \text{Li}_2\text{Se}$

Martin Schmid,<sup>a</sup> Florian Pielhofer<sup>a</sup> and Arno Pfitzner<sup>\*a</sup>

Supporting information

## Table of Contents

|                                   |   |
|-----------------------------------|---|
| 1. X-Ray powder diffraction ..... | 2 |
| 2. Thermal analysis.....          | 4 |
| 3. Conductivity experiments.....  | 6 |

# 1. X-Ray powder diffraction

## Index and refinement of the cubic polymorph $\beta$ -Li<sub>3</sub>As

Wavelength: 1.540598

Number of accepted peaks: 11

2Theta window: 0.050

2Theta zeropoint: -0.0354 (refineable)

Symmetry: Cubic F

Space group:  $Fm\bar{3}m$  (No. 225)

Initial cell parameters:

Cell\_A: 6.2148

Refined cell parameters:

Cell\_A: 6.2148(12)

Cell\_Volume: 240.04(8)

Number of single indexed lines: 11

Number of unindexed lines: 0

Profile Function: Pseudo-Voigt

2Theta zeropoint: -0.035(14)

Final 2Theta window: 0.0400

| N  | 2Th[obs] | H | K | L | 2Th[calc] | obs-calc | Int.  | d[obs] | d[calc] |
|----|----------|---|---|---|-----------|----------|-------|--------|---------|
| 1  | 24.799   | 1 | 1 | 1 | 24.794    | 0.0051   | 100.0 | 3.5874 | 3.5881  |
| 2  | 28.707   | 2 | 0 | 0 | 28.706    | 0.0017   | 41.6  | 3.1072 | 3.1074  |
| 3  | 41.043   | 2 | 2 | 0 | 41.045    | -0.0016  | 1.5   | 2.1973 | 2.1973  |
| 4  | 48.538   | 3 | 1 | 1 | 48.546    | -0.0075  | 20.8  | 1.8741 | 1.8738  |
| 5  | 50.851   | 2 | 2 | 2 | 50.854    | -0.0032  | 5.2   | 1.7942 | 1.7941  |
| 6  | 59.450   | 4 | 0 | 0 | 59.443    | 0.0070   | 2.6   | 1.5535 | 1.5537  |
| 7  | 65.399   | 3 | 3 | 1 | 65.404    | -0.0045  | 5.3   | 1.4259 | 1.4258  |
| 8  | 67.314   | 4 | 2 | 0 | 67.325    | -0.0118  | 3.6   | 1.3899 | 1.3897  |
| 9  | 74.811   | 4 | 2 | 2 | 74.776    | 0.0354   | 4.3   | 1.2681 | 1.2686  |
| 10 | 80.160   | 5 | 1 | 1 | 80.188    | -0.0277  | 3.5   | 1.1964 | 1.1960  |
| 11 | 89.045   | 4 | 4 | 0 | 89.038    | 0.0071   | 1.0   | 1.0986 | 1.0986  |

Average delta(2Theta) = 0.010

Maximum delta(2Theta) = 0.035 (peak 9) = 3.5 \* average

Figure of Merit F(11) = 89.6 ( 0.010, 12 )

Durbin-Watson serial correlation = 3.325

Sqrt[ sum( w \* delta(q)^2 ) / ( Nobs - Nvar ) ] = 0.0001267

Program: STOE-WinXPOW, Vol. Version 3.0.2.5, STOE & Cie GmbH Darmstadt, 2011.

## The system $\text{Li}_3\text{As} - \text{Li}_2\text{Se}$

**Table S1.** Lattice parameters of  $\text{Li}_{3-x}\text{As}_{1-x}\text{Se}_x$  ( $0.2 \leq x \leq 1$ ).

| $x$ | $a / \text{\AA}$ |
|-----|------------------|
| 0.2 | 6.1573(2)        |
| 0.3 | 6.1614(4)        |
| 0.4 | 6.1404(2)        |
| 0.5 | 6.1126(2)        |
| 0.6 | 6.0770(2)        |
| 0.7 | 6.0445(2)        |
| 0.8 | 6.01576(14)      |
| 0.9 | 6.00524(19)      |

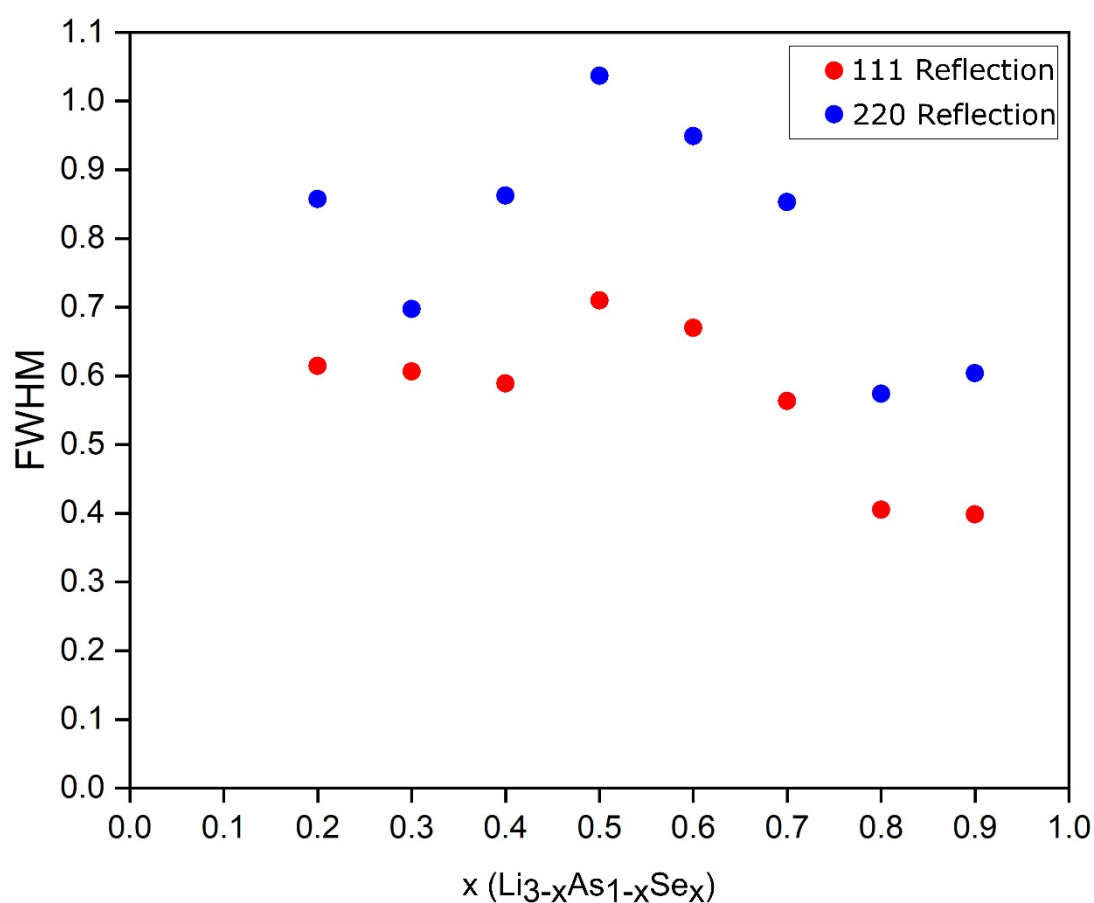

**Figure S1.** Diagram of the Full Width at Half Maximum (FWHM) depending on the mole fraction  $x$  in the solid solution  $\text{Li}_{3-x}\text{As}_{1-x}\text{Se}_x$  ( $0.2 \leq x \leq 1$ ). The FWHM was determined for the first (111 Reflex, red) and third (220 Reflex, blue) reflection of the cubic reflexion profiles in Figure 4. For  $x = 0.2 - 0.6$ , 36 milling cycles were applied and for  $x = 0.7 - 0.9$ , 12 milling cycles were applied. Therefore, the crystallinity of the ball milled samples corresponds with the number of ball mill cycles.

## 2. Thermal analysis

### The system $\text{Li}_3\text{As} - \text{Li}_2\text{Se}$

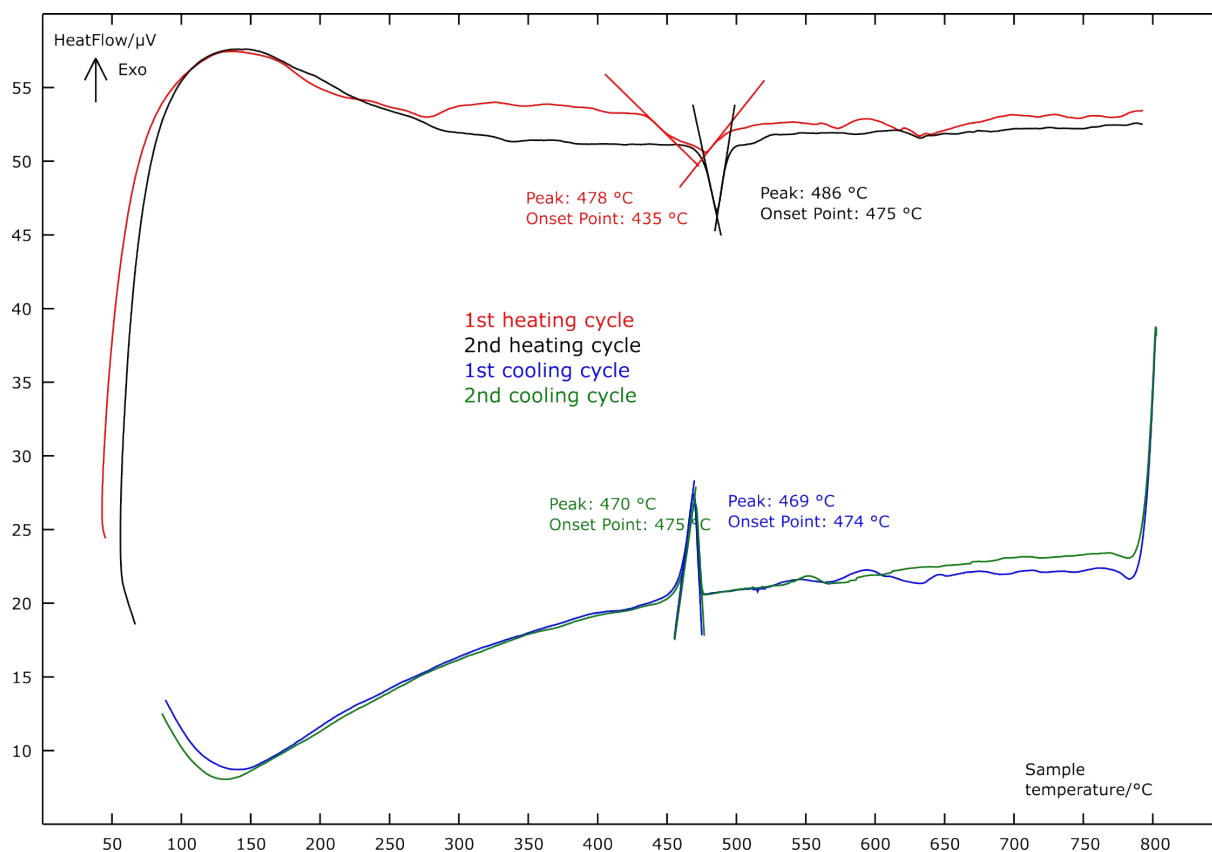

**Figure S2.** Differential thermal analysis of  $\text{Li}_{2.6}\text{As}_{0.6}\text{Se}_{0.4}$  showing endothermal effects in the heating cycles (red and black) and exothermal effects in the cooling cycles (blue and green).

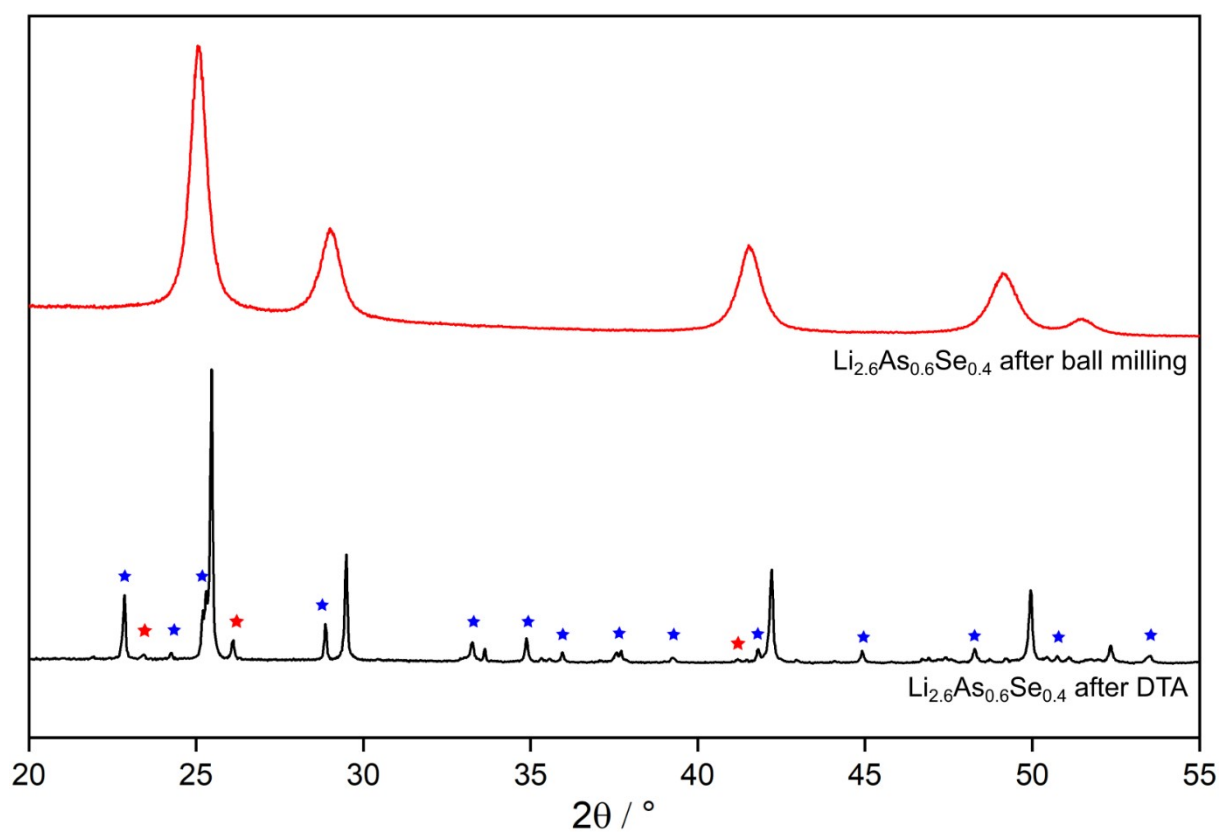

**Figure S3.** Powder diffractogram of  $\text{Li}_{2.6}\text{As}_{0.6}\text{Se}_{0.4}$  after ball milling (red) and after DTA (black). Intensities marked with a red star can be assigned to  $\text{Li}_3\text{As}$  and intensities marked with a blue star can be assigned to  $\text{LiAs}$ .

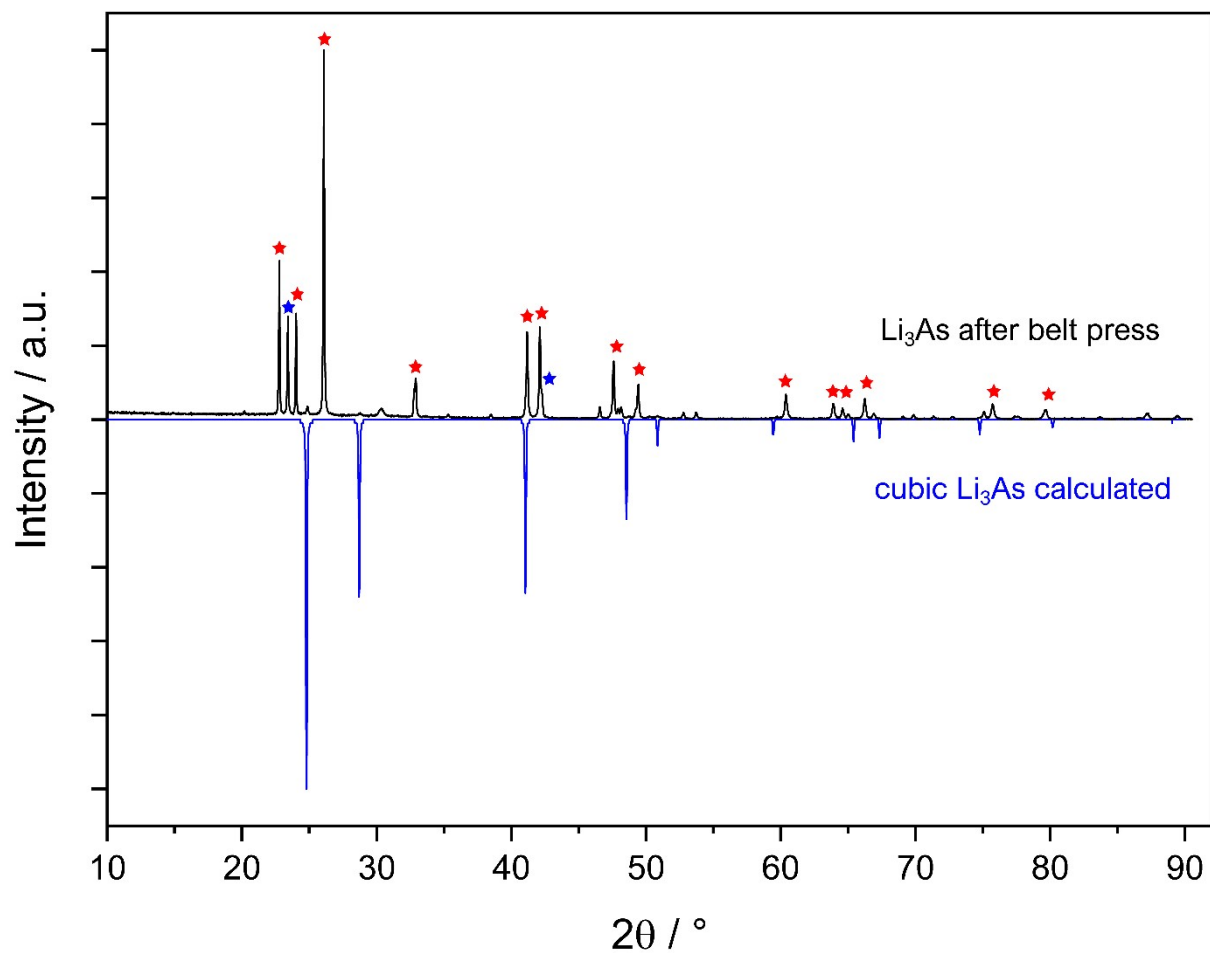

**Figure S4.** Powder diffractogram of  $\text{Li}_3\text{As}$  after quenching from high-pressure (3.6 GPa) and temperature (700 °C) to ambient conditions (black). Intensities marked with red stars can be assigned to hexagonal  $\text{Li}_3\text{As}$ . The intensity marked in blue cannot be assigned to any phase. Negative intensities show the calculated cubic  $\text{Li}_3\text{As}$  modification in the space group  $Fm\bar{3}m$  (No. 225)

### 3. Conductivity experiments

Lithium-ion mobility was determined via a Zahner Zennium impedance analyser connected to an inhouse built cell. All measurements and sample preparations were carried out in an argon filled Glovebox (M Braun) with oxygen and moisture levels below 0.5 ppm. The synthesized powders were pressed (6 t) to cylindrical pellets ( $\varnothing = 8$  mm) obtaining pellet densities from 82 - 85% (Table S6). The cold pressed pellets were placed between two indium foils surrounded by platin electrodes connected to the impedance analyser:

(corundum // platin contact // indium foil // **sample** // indium foil // platin contact // corundum)

Please note that for the sample of  $\text{Li}_2\text{Se}$  gold foil was used instead of indium foil to contact the pellet. Two heating and two subsequent colling cycles were performed in a temperature range of 50 °C – 100 °C in steps of 10 °C with an excitation voltage of 50 mV. For each temperature the impedance was measured in a frequency range of 1 MHz to 100 mHz. To determine the specific lithium-ion conductivities of the samples data evaluation was only applied for the last cooling cycle, because estimated sintering processes via measurements led to bad data quality for the previous cycles. The impedance data of the samples at 50 °C are displayed in the corresponding Nyquist plots (Figure S3) and were analysed by fitting the measured data with an equivalent circuit. Depending on the samples different equivalent circuits were used (Table S4) and the retrieved resistance values were used to calculate the specific lithium-ion conductivity in dependence of the sample geometry and crystallographic density. Activation energies of the measured samples are displayed in Table S5.

**Table S2.** Lithium-ion conductivities of the solid solution in the system  $\text{Li}_3\text{As} - \text{Li}_2\text{Se}$ .

| Temperature /<br>°C | specific lithium-ion conductivity / $\text{S}\cdot\text{cm}^{-1}$ |                                                 |                                                 |                                                 |
|---------------------|-------------------------------------------------------------------|-------------------------------------------------|-------------------------------------------------|-------------------------------------------------|
|                     | $\text{Li}_{2.2}\text{As}_{0.2}\text{Se}_{0.8}$                   | $\text{Li}_{2.4}\text{As}_{0.4}\text{Se}_{0.6}$ | $\text{Li}_{2.6}\text{As}_{0.6}\text{Se}_{0.4}$ | $\text{Li}_{2.8}\text{As}_{0.8}\text{Se}_{0.2}$ |
| 50                  | $3.1(5) \cdot 10^{-6}$                                            | $2.1(2) \cdot 10^{-4}$                          | $7.6(1) \cdot 10^{-4}$                          | $6.0(8) \cdot 10^{-4}$                          |
| 60                  | $2.0(6) \cdot 10^{-6}$                                            | $3.5(9) \cdot 10^{-4}$                          | $1.1(8) \cdot 10^{-3}$                          | $9.6(3) \cdot 10^{-4}$                          |
| 70                  | $1.4(1) \cdot 10^{-6}$                                            | $5.5(1) \cdot 10^{-4}$                          | $1.7(5) \cdot 10^{-3}$                          | $1.5(3) \cdot 10^{-3}$                          |
| 80                  | $8.8(1) \cdot 10^{-5}$                                            | $7.3(6) \cdot 10^{-4}$                          | $2.5(5) \cdot 10^{-3}$                          | $2.6(5) \cdot 10^{-3}$                          |
| 90                  | $5.3(9) \cdot 10^{-5}$                                            | $1.1(4) \cdot 10^{-3}$                          | $3.7(1) \cdot 10^{-3}$                          | $3.9(4) \cdot 10^{-3}$                          |
| 100                 | $3.1(8) \cdot 10^{-5}$                                            | $1.6(3) \cdot 10^{-3}$                          | $5.2(9) \cdot 10^{-3}$                          | $6.3(3) \cdot 10^{-3}$                          |



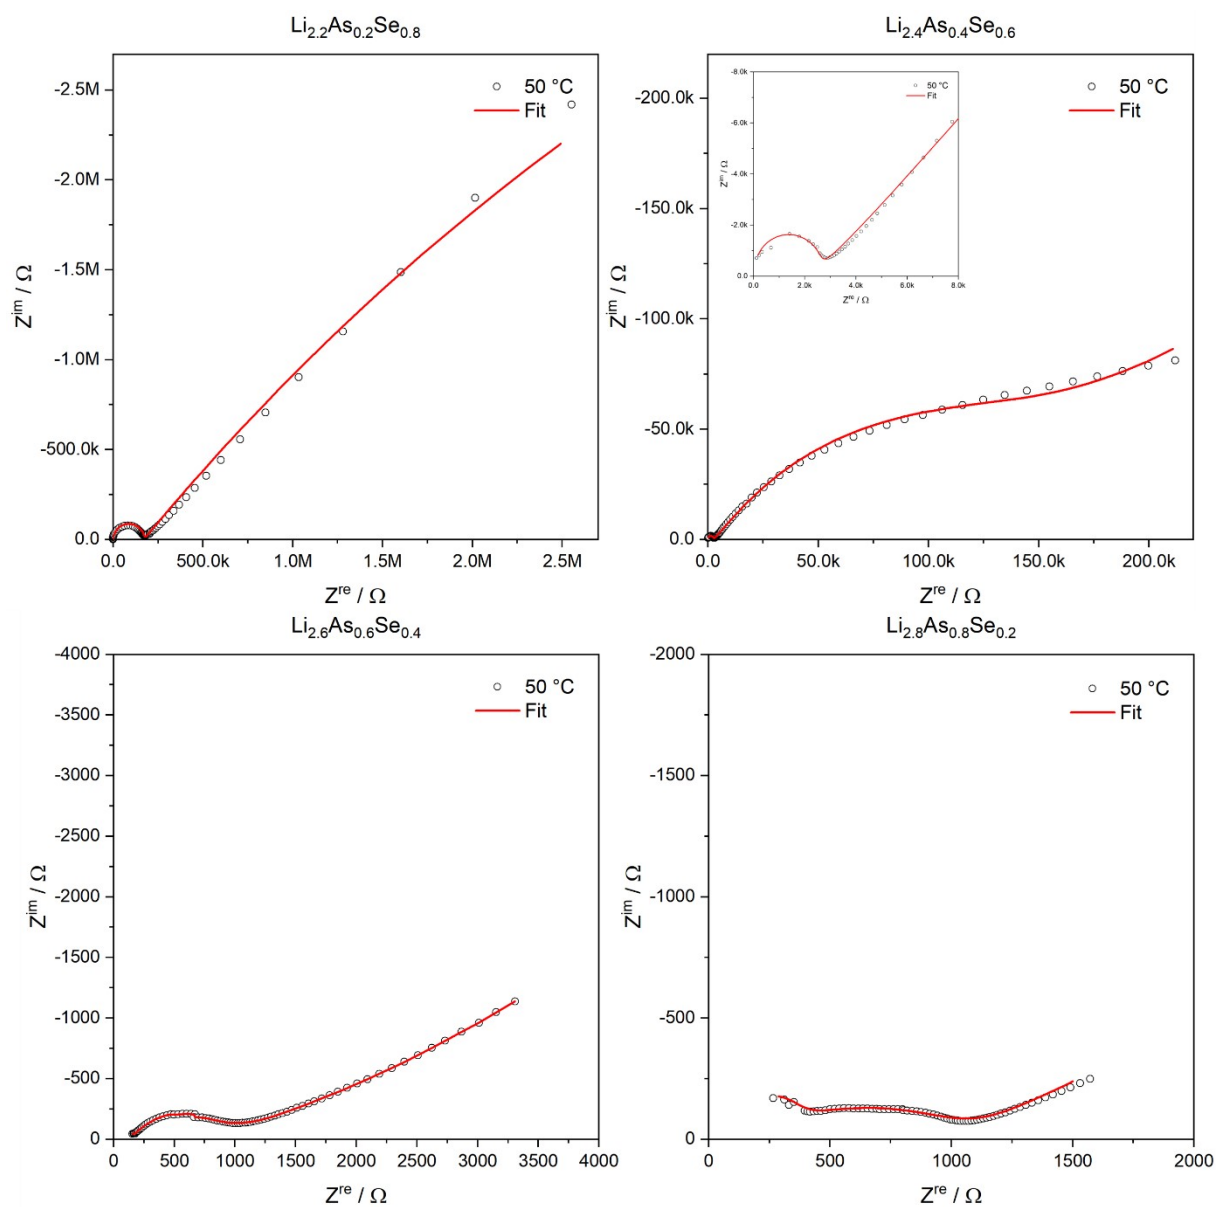

**Figure S5.** Nyquist plots at 50 °C of the solid solution in the system  $\text{Li}_3\text{As} - \text{Li}_2\text{Se}$ . Measured data points are displayed in black and the fitted values of the equivalent circuits are displayed in red.

**Table S3.** Specific lithium-ion conductivities of  $\text{Li}_2\text{Se}$ .

| Temperature / °C | specific lithium-ion conductivity / $\text{S}\cdot\text{cm}^{-1}$ |
|------------------|-------------------------------------------------------------------|
| 175              | $2.9(2) \cdot 10^{-7}$                                            |
| 200              | $1.8(9) \cdot 10^{-6}$                                            |
| 225              | $6.0(1) \cdot 10^{-6}$                                            |
| 250              | $2.0(5) \cdot 10^{-5}$                                            |
| 275              | $4.3(1) \cdot 10^{-5}$                                            |
| 300              | $7.6(5) \cdot 10^{-5}$                                            |

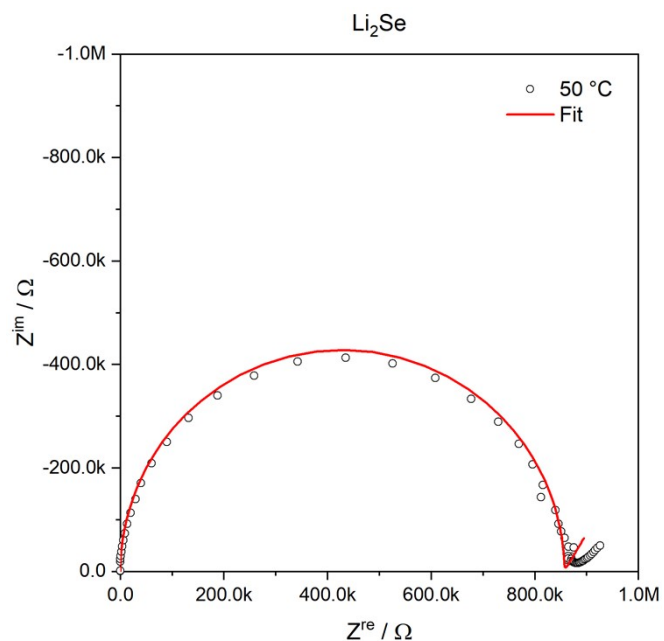**Figure S6.** Nyquist plots at 175 °C of  $\text{Li}_2\text{Se}$ . Measured data points are displayed in black and the fitted values of the equivalent circuits are displayed in red.

For  $\text{Li}_2\text{Se}$  an activation energy of  $E_a = 0.98$  eV and pellet density of 80.33% was determined.

**Table S4.** Equivalent circuits used for fitting the impedance data of the corresponding system.

| System /<br>compound                            | equivalent circuit                                                                  | Resistor used<br>for<br>conductivity<br>determination |
|-------------------------------------------------|-------------------------------------------------------------------------------------|-------------------------------------------------------|
| $\text{Li}_{2.2}\text{As}_{0.2}\text{Se}_{0.8}$ | 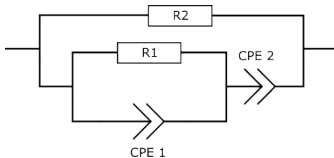  | R1                                                    |
| $\text{Li}_{2.4}\text{As}_{0.4}\text{Se}_{0.6}$ |   | R1                                                    |
| $\text{Li}_{2.6}\text{As}_{0.6}\text{Se}_{0.4}$ |   | R2                                                    |
| $\text{Li}_{2.8}\text{As}_{0.8}\text{Se}_{0.2}$ |  | R2 + R3                                               |
| $\text{Li}_2\text{Se}$                          |  | R1                                                    |

**Table S5.** Activation energies  $E_a$  of the solid solutions in the system  $\text{Li}_3\text{As} - \text{Li}_2\text{Se}$ .

| $\text{Li}_3\text{As} - \text{Li}_2\text{Se}$   | $E_a / \text{eV}$ |
|-------------------------------------------------|-------------------|
| $\text{Li}_{2.2}\text{As}_{0.2}\text{Se}_{0.8}$ | 0.44              |
| $\text{Li}_{2.4}\text{As}_{0.4}\text{Se}_{0.6}$ | 0.41              |
| $\text{Li}_{2.6}\text{As}_{0.6}\text{Se}_{0.4}$ | 0.44              |
| $\text{Li}_{2.8}\text{As}_{0.8}\text{Se}_{0.2}$ | 0.47              |

**Table S6.** Pellet densities of the samples in the system  $\text{Li}_3\text{As} - \text{Li}_2\text{Se}$ .

| $\text{Li}_3\text{As} - \text{Li}_2\text{Se}$   | %     |
|-------------------------------------------------|-------|
| $\text{Li}_{2.2}\text{As}_{0.2}\text{Se}_{0.8}$ | 85.41 |
| $\text{Li}_{2.4}\text{As}_{0.4}\text{Se}_{0.6}$ | 85.12 |
| $\text{Li}_{2.6}\text{As}_{0.6}\text{Se}_{0.4}$ | 82.72 |
| $\text{Li}_{2.8}\text{As}_{0.8}\text{Se}_{0.2}$ | 82.03 |
